# Supplementary material for: Optimal annual body mass index change for preventing spontaneous preterm birth in a subsequent pregnancy
Source: PubMed Central journal article supplement (PMC9582014; doi:10.1038/s41598-022-22495-4), 2022-10-19
Supplement: 41598_2022_22495_MOESM2_ESM.pdf [file 41598_2022_22495_MOESM2_ESM.pdf]

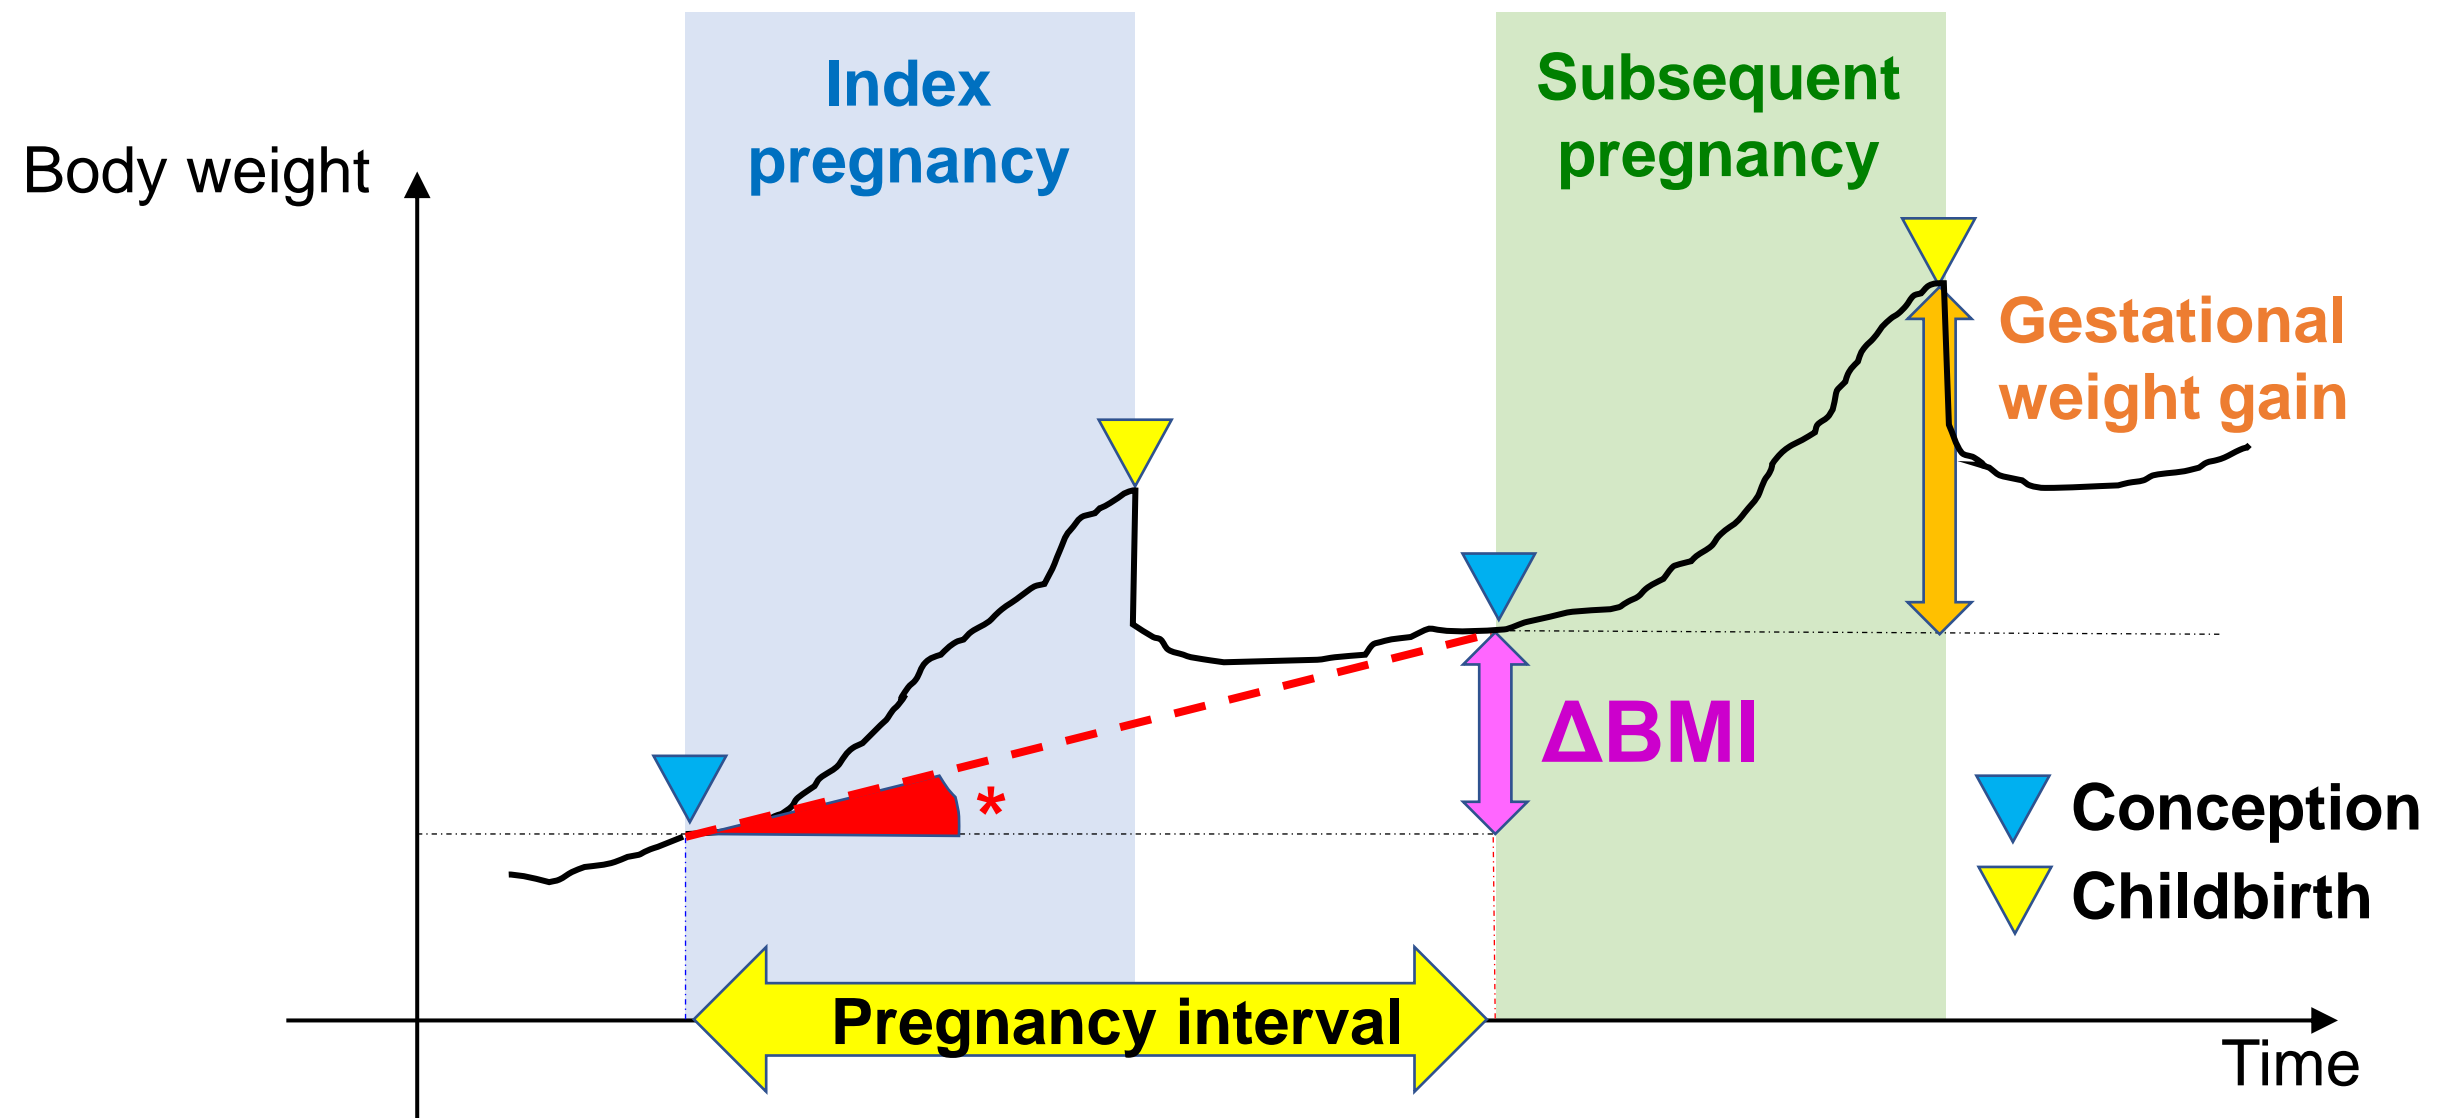

**\*Annual BMI change =  $\Delta\text{BMI} / \text{Pregnancy interval}$  (kg/m<sup>2</sup>/year)**
